# Supplementary material
Source: PubMed Central journal article supplement (PMC3276660)
Supplement: mmc1.pdf [file mmc1.pdf]

**Supplemental Data**

**Mutations in *KIF11* Cause Autosomal-Dominant  
Microcephaly Variably Associated with Congenital  
Lymphedema and Chorioretinopathy**

Pia Ostergaard, Michael A Simpson, Antonella Mendola, Pradeep Vasudevan, Fiona C Connell, Andreas van Impel, Anthony T Moore, Bart L Loeys, Arash Ghalamkarpour, Alexandros Onoufriadis, Ines Martinez-Corral, Sophie Devery, Jules G Leroy, Lut van Laer, Amihood Singer, Martin G Bialer, Meriel McEntagart, Oliver Quarrell, Glen Brice, Richard C Trembath, Stefan Schulte-Merker, Taija Makinen, Miikka Vikkula, Peter S Mortimer, Sahar Mansour, and Steve Jeffery

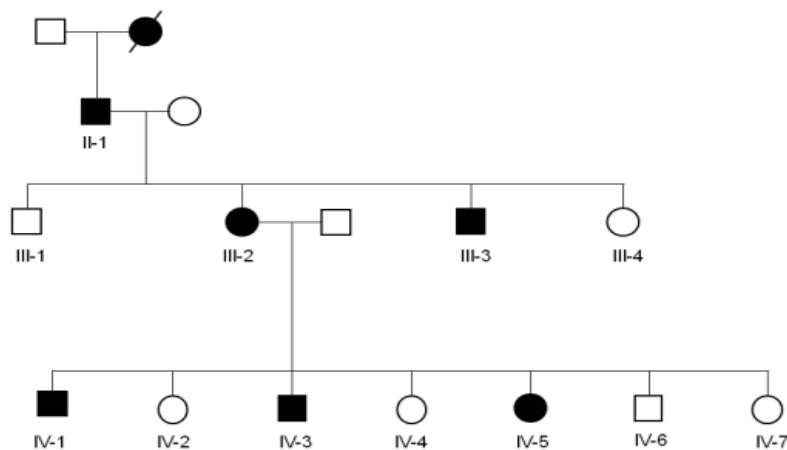

**Figure S1. Pedigree Structure and Mutation Status for Family MLCRD11**

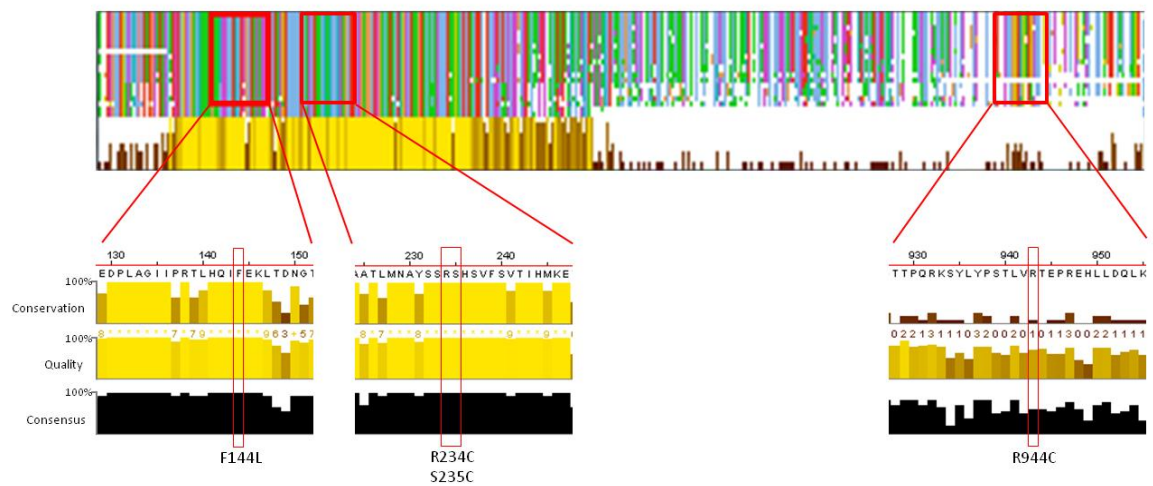

**Figure S2. Conservation of Residues for the Four Missense Mutations**

Top panel illustrates regions of conservation in *KIF11* across 18 species. Conserved residues are indicated by color. Lower panel zooms in on the regions of each of the missense mutations. Residues F144, R234C and S235C are highly conserved across all compared species and have PSIC scores of 2.551, 3.065 and 2.321 respectively, which indicate that the amino acid changes are likely to be deleterious to protein function. The R944C is conserved in fourteen out of the eighteen species included in the comparison and has a PSIC score of 2.42.

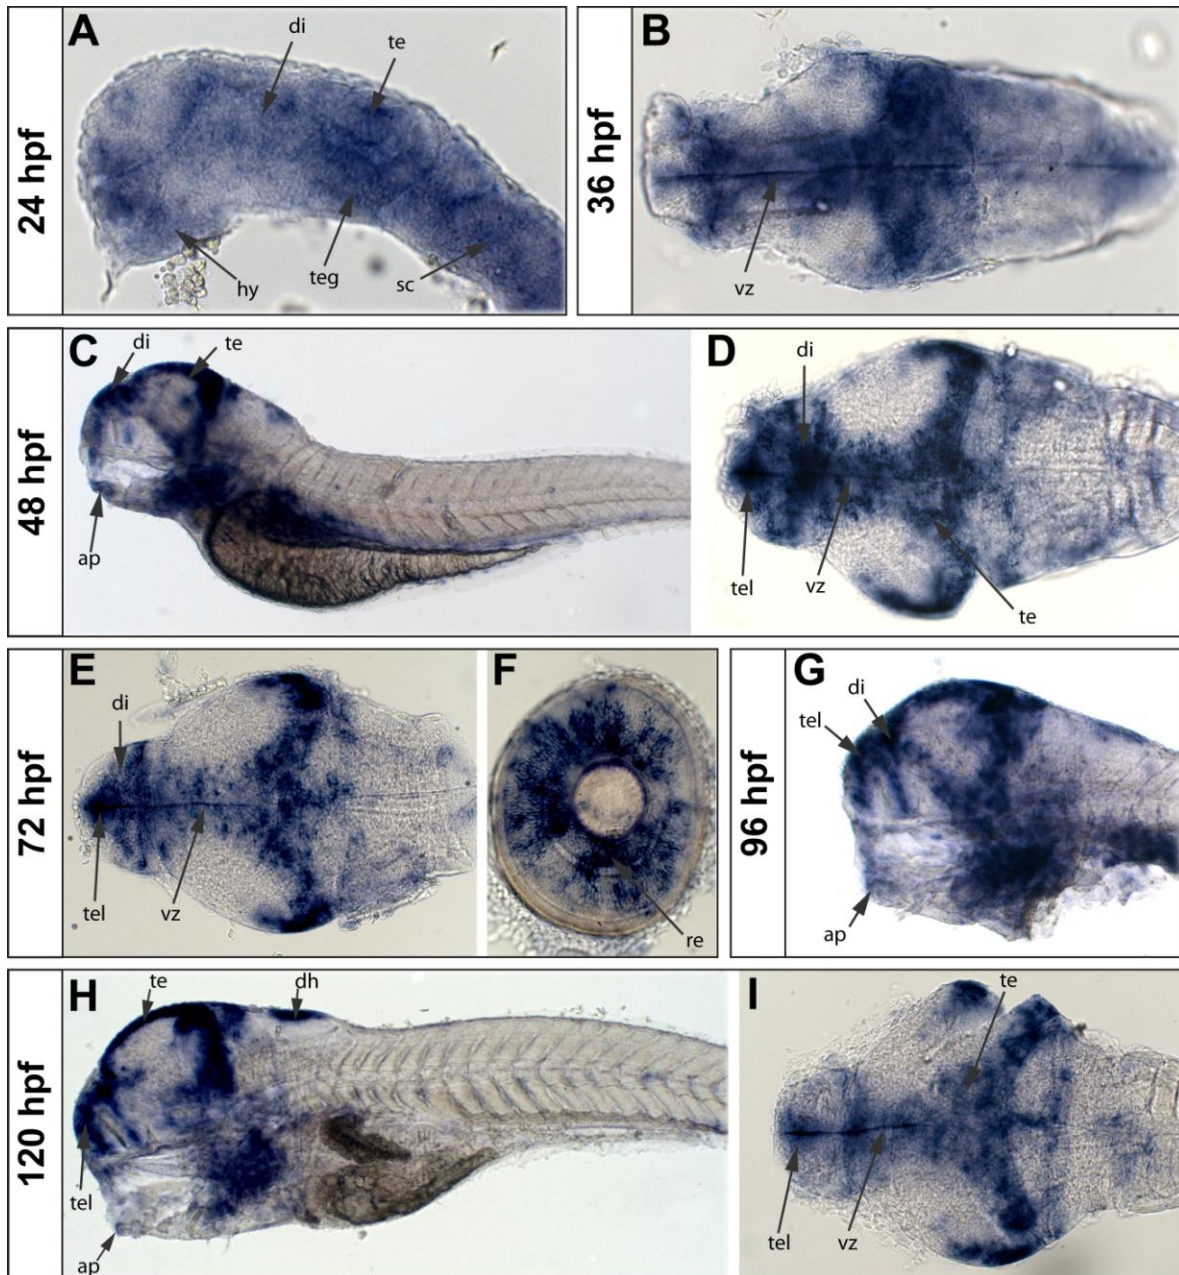

**Figure S3. Zebrafish *kif11* Is Expressed in Tissues Associated with High Mitotic Activity**

Whole mount in situ hybridization of albino zebrafish embryos at 24 hours post fertilization (A), 36 hpf (B), 48 hpf (C, D), 72 hpf (E, F), 96 hpf (G), and 120 hpf (H, I). Shown are lateral (A, C, F, G, H) and dorsal (B, D, E, I) views. Embryos were dissected and flat-mounted in glycerol for imaging. *kif11* mRNA is expressed in a highly dynamic fashion during embryonic development. Consistent with the mitotic role of *kif11*, the gene is strongly expressed in proliferating tissues of the embryo including various parts of the brain and the spinal cord after 24 hpf (A). From 36 hpf onwards, the brain specific expression pattern of *kif11* becomes more restricted and transcripts can continuously be detected within the ventricular zone of the brain (B-E, G-I). In addition, *kif11* mRNA is evident in a subset of retina cells. This expression seems to be confined to a proliferative region at the periphery of the retina, called the ciliary marginal zone (F). ap: anterior pituitary, di: diencephalon, dh: dorsal hindbrain, hy: hypothalamus, re: retina, sc: spinal cord, te: tectum, teg: tegmentum, tel: telencephalon, vz: ventricular zone.

**Table S1. Clinical Observations in the Nine Subjects in whom No *KIF11* Coding Sequence Variant Was Identified**

| Pedigree | ID               | Gender | Head circumference (SD) | Lymphedema                         | Eye abnormalities             | Additional notes                            |
|----------|------------------|--------|-------------------------|------------------------------------|-------------------------------|---------------------------------------------|
| MLCRD04  | I-1 <sup>a</sup> | female | -3.4                    | congenital, bilateral, lower limb  | none                          | mild LD                                     |
| MLCRD05  | I-1 <sup>a</sup> | male   | -3.0                    | congenital, bilateral, lower limb  | none                          | ASD, hypospadias, atypical dysmorphism      |
| MLCRD13  | I-1              | female | -3.0                    | onset age 6, bilateral, lower limb | alternating convergent squint | mild LD                                     |
| MLCRD14  | I-1              | male   | -2.5                    | congenital, bilateral, lower limb  | none                          | mild LD, thrombocytopenia, persistent warts |
| CDMMR06  | I-1              | female | by history              | none                               | left retinal detachment       | mild LD, ASD                                |

MLCRD – microcephaly-lymphedema-chorioretinal dysplasia syndrome, CDMMR - chorioretinal dysplasia-microcephaly-mental retardation, LD - learning difficulties, ASD - atrial septal defect. Head Circumference - standard deviations from the mean of occipitofrontal head circumference, and corrected for age and sex.

<sup>a</sup> Individuals exome sequenced in primary analysis.

**Table S2. Summary Statistics for Exome Sequencing - Mapping and Coverage**

| Sequenced Exomes                          | MLCRD01  | MLCRD02  | MLCRD03  | MLCRD04  | MLCRD05  |
|-------------------------------------------|----------|----------|----------|----------|----------|
| Uniquely mapped reads                     | 77649450 | 67741032 | 69344296 | 38731048 | 68231238 |
| Uniquely mapped to target +/- 150bp reads | 52443413 | 44210462 | 45807664 | 27879495 | 43115963 |
| Uniquely mapped to target reads           | 40683900 | 33622720 | 35346690 | 21068627 | 32330469 |
| CCDS bases with coverage >1               | 26964657 | 27079271 | 27036220 | 26952834 | 27065091 |
| CCDS bases with coverage >5               | 25522583 | 25666954 | 25572227 | 24758173 | 25689190 |
| CCDS bases with coverage >10              | 23888785 | 23972814 | 23850746 | 22021708 | 24016992 |
| CCDS bases with coverage >20              | 21159028 | 20930306 | 20913016 | 17498285 | 20912346 |
| Mean coverage                             | 72.86    | 59.67    | 63.42    | 37.49    | 57.92    |

Total number of mapped reads and resulting coverage of the CCDS exome.

**Table S3. Summary Statistics for Exome Sequencing - Variant Calling**

| Variant type                  | MLCRD01 |       | MLCRD02 |       | MLCRD03 |       | MLCRD04 |       | MLCRD05 |       |
|-------------------------------|---------|-------|---------|-------|---------|-------|---------|-------|---------|-------|
|                               | known   | novel |
| All variants                  | 18320   | 322   | 18220   | 215   | 18431   | 182   | 18448   | 187   | 17834   | 204   |
| heterozygous                  | 11004   | 314   | 10705   | 210   | 11108   | 181   | 10905   | 183   | 10764   | 197   |
| homozygous                    | 7316    | 8     | 7515    | 5     | 7323    | 1     | 7543    | 4     | 7070    | 7     |
| Indels                        | 196     | 9     | 217     | 10    | 221     | 10    | 233     | 13    | 199     | 7     |
| heterozygous                  | 109     | 9     | 126     | 10    | 129     | 10    | 127     | 12    | 115     | 7     |
| homozygous                    | 87      | 0     | 91      | 0     | 92      | 0     | 106     | 1     | 84      | 0     |
| 3n indels                     | 124     | 6     | 137     | 5     | 137     | 5     | 139     | 8     | 121     | 6     |
| heterozygous                  | 69      | 6     | 81      | 5     | 76      | 5     | 84      | 7     | 70      | 6     |
| homozygous                    | 55      | 0     | 56      | 0     | 61      | 0     | 55      | 1     | 51      | 0     |
| Non 3n indels                 | 72      | 3     | 80      | 5     | 84      | 5     | 94      | 5     | 78      | 1     |
| heterozygous                  | 40      | 3     | 45      | 5     | 53      | 5     | 43      | 5     | 45      | 1     |
| homozygous                    | 32      | 0     | 35      | 0     | 31      | 0     | 51      | 0     | 33      | 0     |
| SNVs                          | 18124   | 313   | 18003   | 205   | 18210   | 172   | 18215   | 174   | 17635   | 197   |
| heterozygous                  | 10895   | 305   | 10579   | 200   | 10979   | 171   | 10778   | 171   | 10649   | 190   |
| homozygous                    | 7229    | 8     | 7424    | 5     | 7231    | 1     | 7437    | 3     | 6986    | 7     |
| Synonymous_SNVs               | 8409    | 98    | 8372    | 63    | 8398    | 51    | 8351    | 48    | 8196    | 75    |
| Heterozygous                  | 5035    | 98    | 4871    | 63    | 4940    | 51    | 4869    | 48    | 4894    | 75    |
| Homozygous                    | 3374    | 0     | 3501    | 0     | 3458    | 0     | 3482    | 0     | 3302    | 0     |
| Nonsynonymous_SNVs            | 9715    | 215   | 9631    | 142   | 9812    | 121   | 9864    | 126   | 9439    | 122   |
| heterozygous                  | 5860    | 207   | 5708    | 137   | 6039    | 120   | 5909    | 123   | 5755    | 115   |
| homozygous                    | 3855    | 8     | 3923    | 5     | 3773    | 1     | 3955    | 3     | 3684    | 7     |
| Splice site (10bp)            | 2163    | 30    | 2076    | 22    | 2152    | 21    | 2052    | 18    | 2060    | 18    |
| heterozygous                  | 1287    | 28    | 1195    | 19    | 1325    | 21    | 1205    | 17    | 1221    | 16    |
| homozygous                    | 876     | 2     | 881     | 3     | 827     | 0     | 847     | 1     | 839     | 2     |
| Transition:Transversion ratio | 3.1     | 2.32  | 3.07    | 2.58  | 3.09    | 2.14  | 2.98    | 2.42  | 3.1     | 3.1   |
| heterozygous                  | 3.21    | 2.36  | 3.05    | 2.59  | 3.07    | 2.12  | 2.97    | 2.43  | 3.07    | 3.15  |
| homozygous                    | 2.94    | 1.33  | 3.11    | 2     | 3.12    | n/a   | 2.99    | 2     | 3.14    | 2     |

Numbers of variants of different classes identified by exome sequencing in the five sequenced cases. SNV - single nucleotide variant, 3n - multiples of three nucleotides.

**Table S4. Numbers of Candidate Genes Highlighted by Exome Sequencing**

| Any x of 5 individuals                    | 1    | 2    | 3    | 4    | 5   |
|-------------------------------------------|------|------|------|------|-----|
| Genes with heterozygous NS/SS/I variants  | 8047 | 5191 | 3139 | 1442 | 436 |
| Not in dbSNP, 1000G or 250 control exomes | 698  | 33   | 1    | 0    | 0   |

NS - nonsynonymous, SS - splice site, I –indels.

**Table S5. Primers Used for Sanger Sequencing and In Situ Hybridization**

Primers used for amplification and sequence analysis of human *KIF11* covering the coding regions and associated splice sites.

| Exon    | Forward                    | Reverse                     | Amplicon length (bp) |
|---------|----------------------------|-----------------------------|----------------------|
| 1       | GCCAGAGTACCGGGTAGAGA       | tattgaacagaacgcggaga        | 386                  |
| 2       | tctccatcaccaacaatgtg       | tcagcccactagaagccatc        | 389                  |
| 3       | gatggcttctagtgggctga       | aaagaaacatgcacccatatga      | 620                  |
| 4       | tcatatgggtgcatgttcttt      | gacagaggcctcaacaag          | 209                  |
| 5       | acagactgtttaaataacttctctaa | caaagcctcacacattaaattc      | 413                  |
| 6       | GTTTGATGATCCCCGTAACAA      | gtgaccacataccctgacc         | 426                  |
| 7       | ttcttgatatctcctgtctgatgtt  | tgtattaaatcgccagcaaaa       | 394                  |
| 8       | tgggtgattagctttgtagtgg     | tgtgagtcactgtgtccatcc       | 500                  |
| 9       | aaaggttgggcatagtggtc       | ccttccatgggcaatttaac        | 360                  |
| 10      | ggtttttcttgggaagtcca       | gcactggatataaagattttac      | 432                  |
| 11      | acttgggtatcaagtgatgtga     | gcttttcacataacagtaaatac     | 257                  |
| 12      | tgtaaactaccggtaacttctt     | ccagtgagaaaaacatggatga      | 474                  |
| 13      | ggctggaaaattactagtctt      | tgcattgtagagagtattgggtga    | 493                  |
| 14      | ttgctttgtagtgagccagttc     | aaagctcaggaagaagaatagca     | 448                  |
| 15 + 16 | tcatttagaaaggtttacagaagtgg | tcaagtcatatcaaatcatcctaaaac | 496                  |
| 17      | cacttccactgctttcctctg      | cagccaggttttcaatgtct        | 493                  |
| 18      | ccagactgtccacgttcagat      | catttgtttgaaatctattcttagcc  | 482                  |
| 19      | agcactactcatgccactgc       | ttccagttttccattttgag        | 525                  |
| 20      | caggtagcaagactgatcctca     | cggggtaagattgaggggta        | 399                  |
| 21      | accatgggcattgtgttatactc    | tgctcaccacgaacaatacc        | 295                  |
| 22      | gttggctcaaactgtgctg        | atctatacacaaggctcaagtt      | 365                  |

Primers used to generate antisense probe for in-situ hybridization

|                            |                                            |
|----------------------------|--------------------------------------------|
| <b>kif11_probe_forward</b> | cctccatcaatctggaggaa                       |
| <b>kif11_probe_revese</b>  | CATTAACCCTCACTAAAGGGAAtgcaaacactgaaccagctc |

**Table S6. Intronic Mutations in *KIF11* that Lead to Splicing Defects**

| Mutation    | WT CV | Mutant CV | CV variation (%) |
|-------------|-------|-----------|------------------|
| c.699-2A>G  | 79.05 | 50.1      | -39.62           |
| c.2547+2T>C | 83.59 | 56.75     | -32.1            |

Prediction of the effect of the splice site mutations on splicing using HSF (Human Splicing Finder v.2.4.1.). CV - consensus value. A negative CV is predictive of the mutation will induce exon skipping.
